# Supplementary material
Source: ML conference proceedings conference paper supplement (https://openreview.net/forum?id=hz9TMobz2q)

# Ensemble Push Scaling on cgcnn

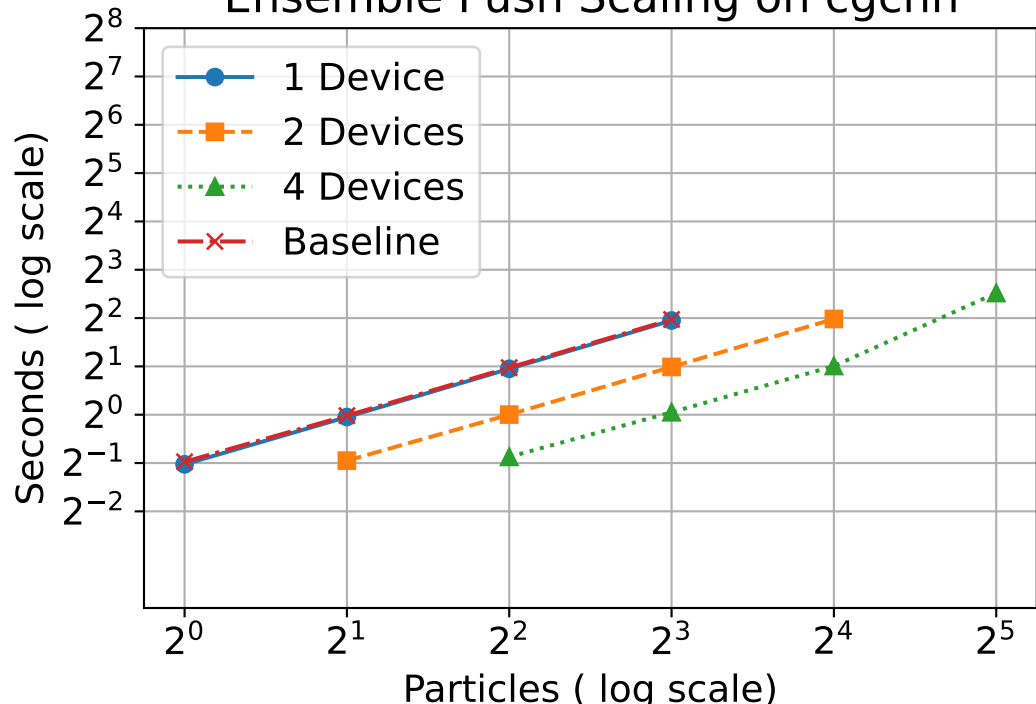

Supplement: supplementary_material [file attachment]

# MSWAG Push Scaling on schnet

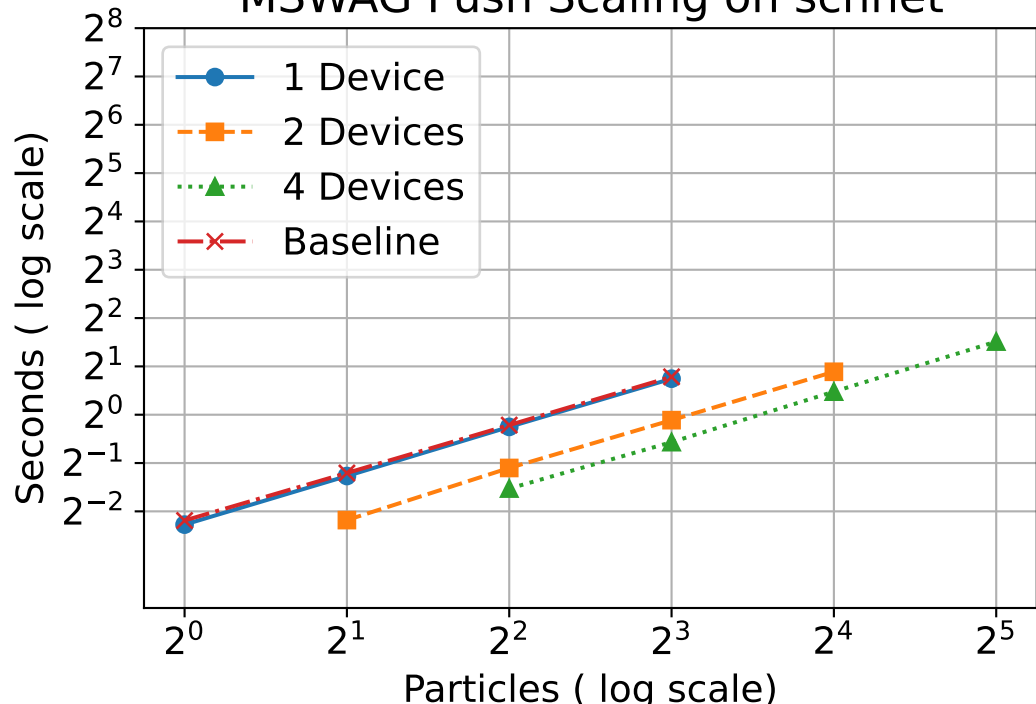

Supplement: supplementary_material [file attachment]

# Ensemble Push Scaling on transformer

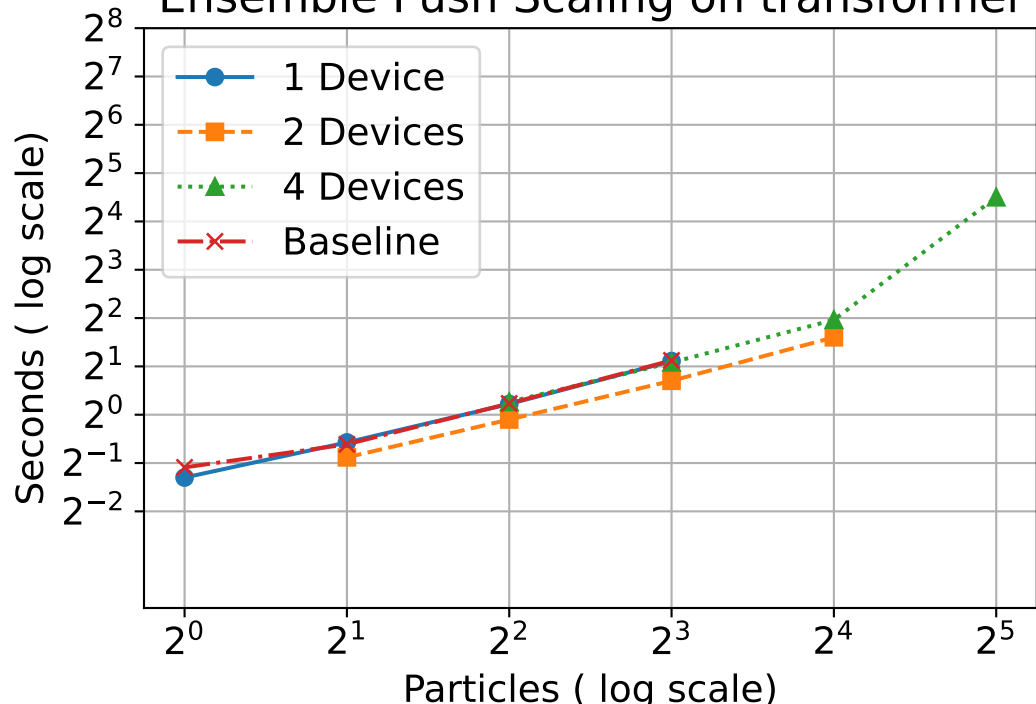

Supplement: supplementary_material [file attachment]

# Ensemble Push Scaling on unet

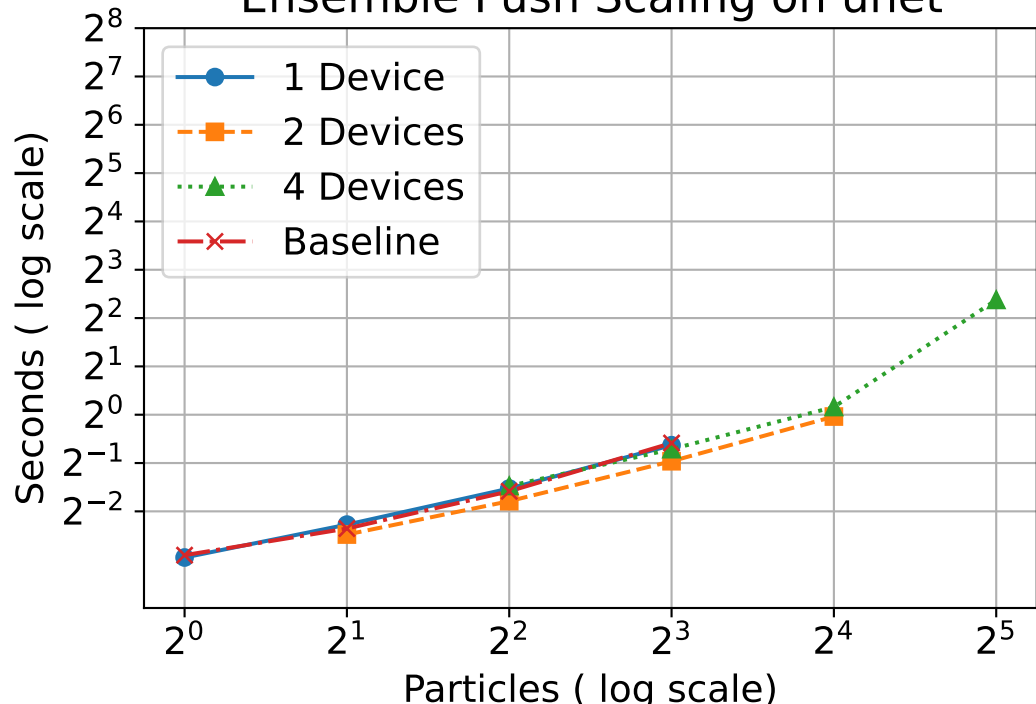

Supplement: supplementary_material [file attachment]

# Stein VGD Push Scaling on schnet

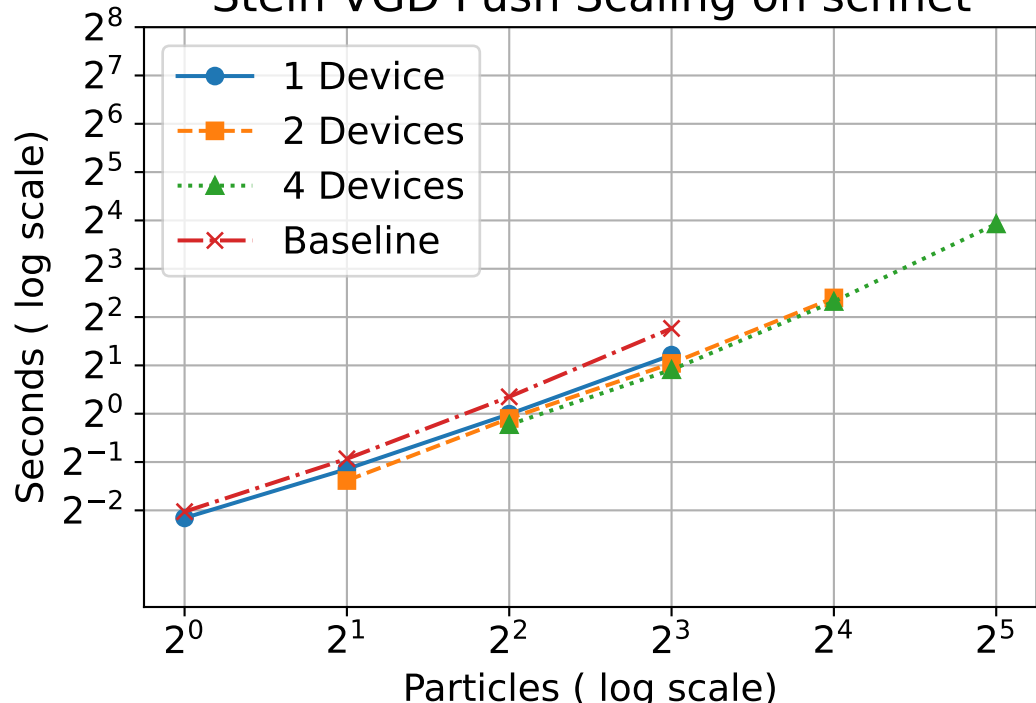

Supplement: supplementary_material [file attachment]

# Stein VGD Push Scaling on resnet

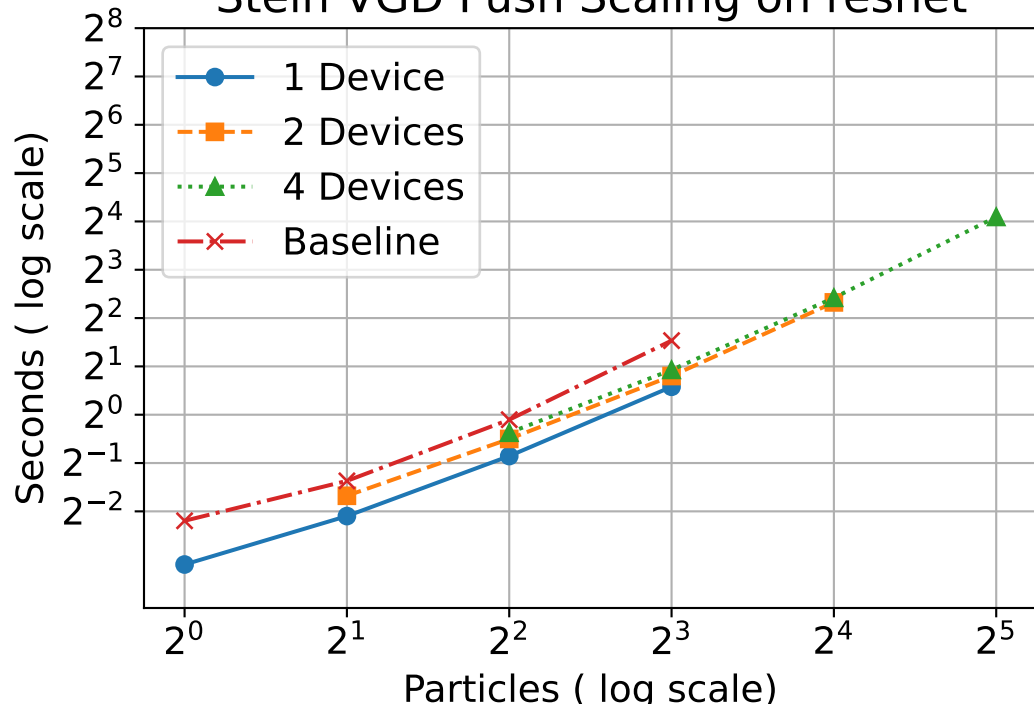

Supplement: supplementary_material [file attachment]

# Ensemble Push Scaling on schnet

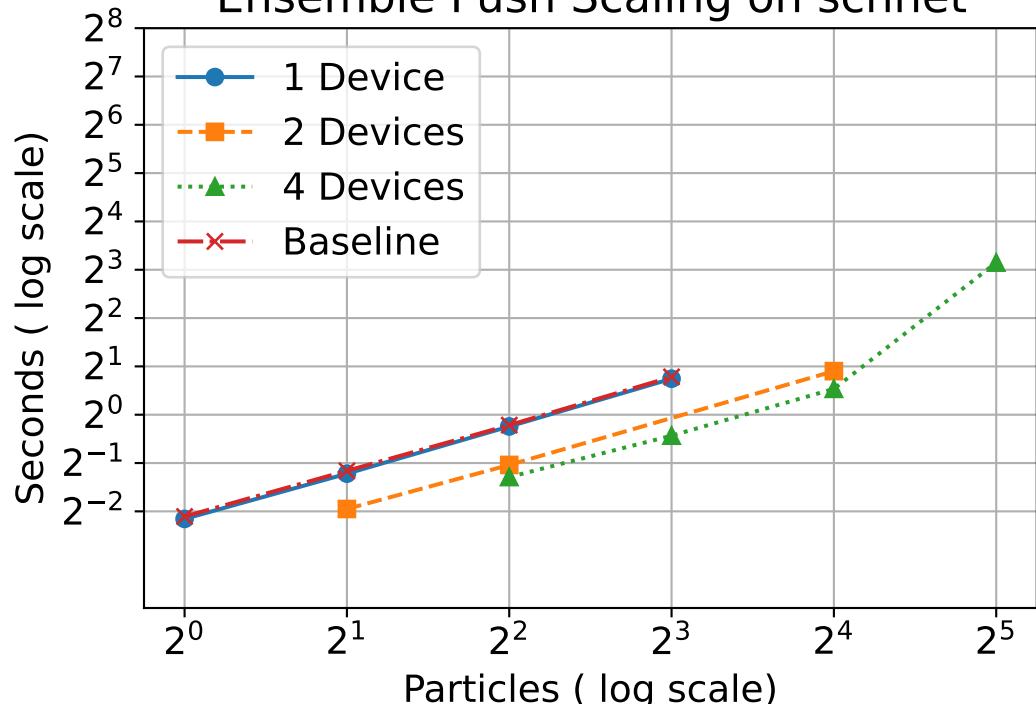

Supplement: supplementary_material [file attachment]

# Stein VGD Push Scaling on transformer

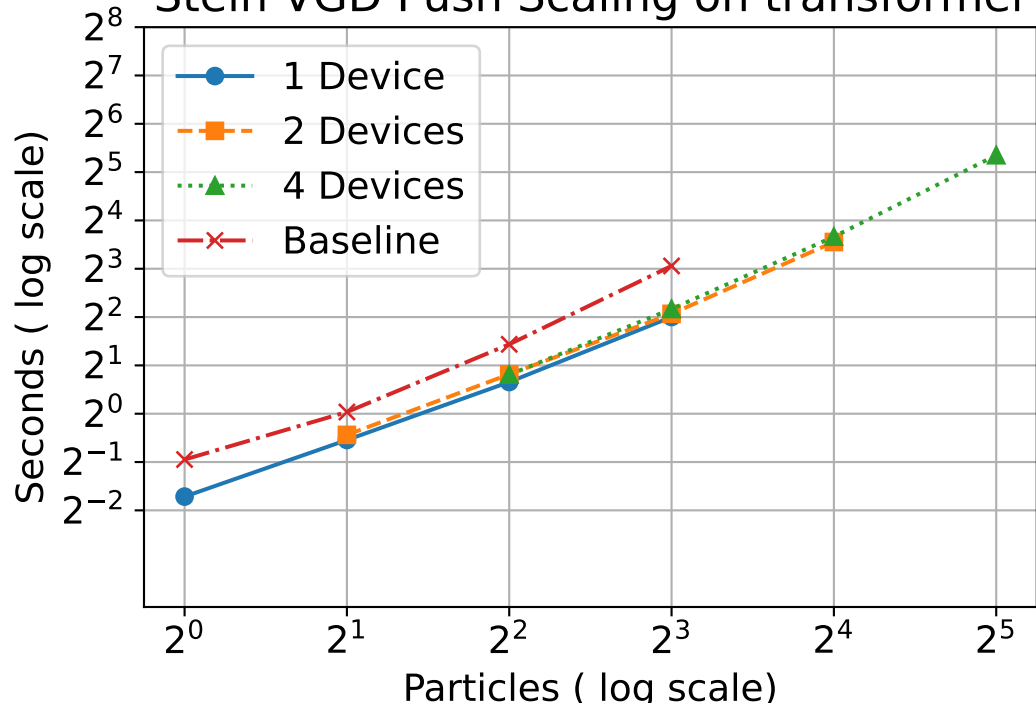

Supplement: supplementary_material [file attachment]

# MSWAG Push Scaling on cgcnn

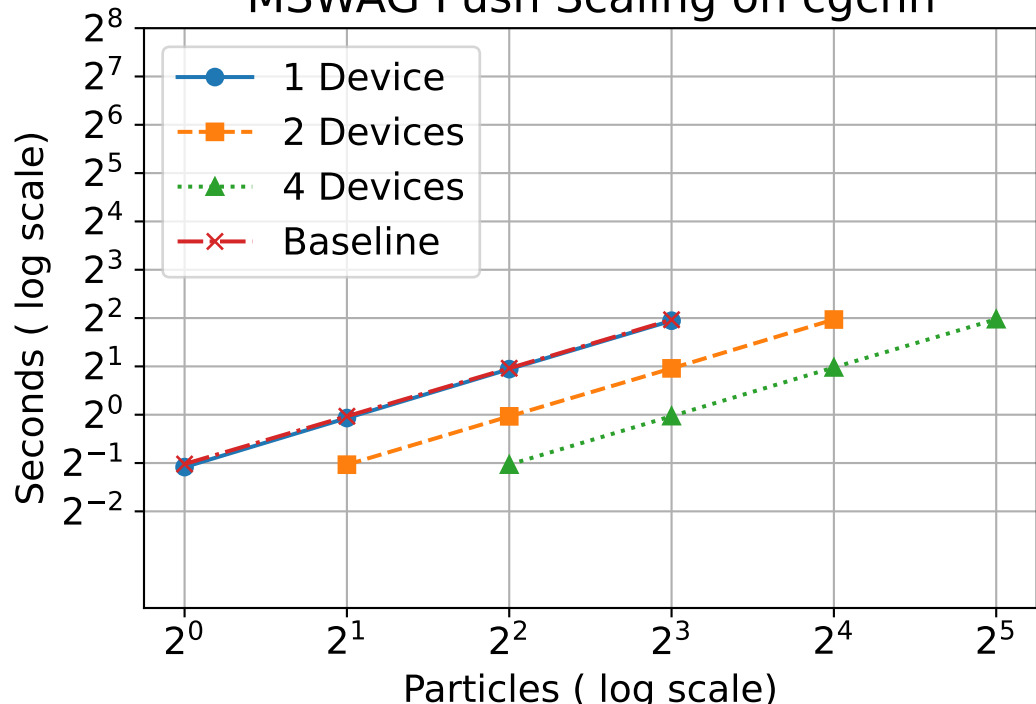

Supplement: supplementary_material [file attachment]

# MSWAG Push Scaling on resnet

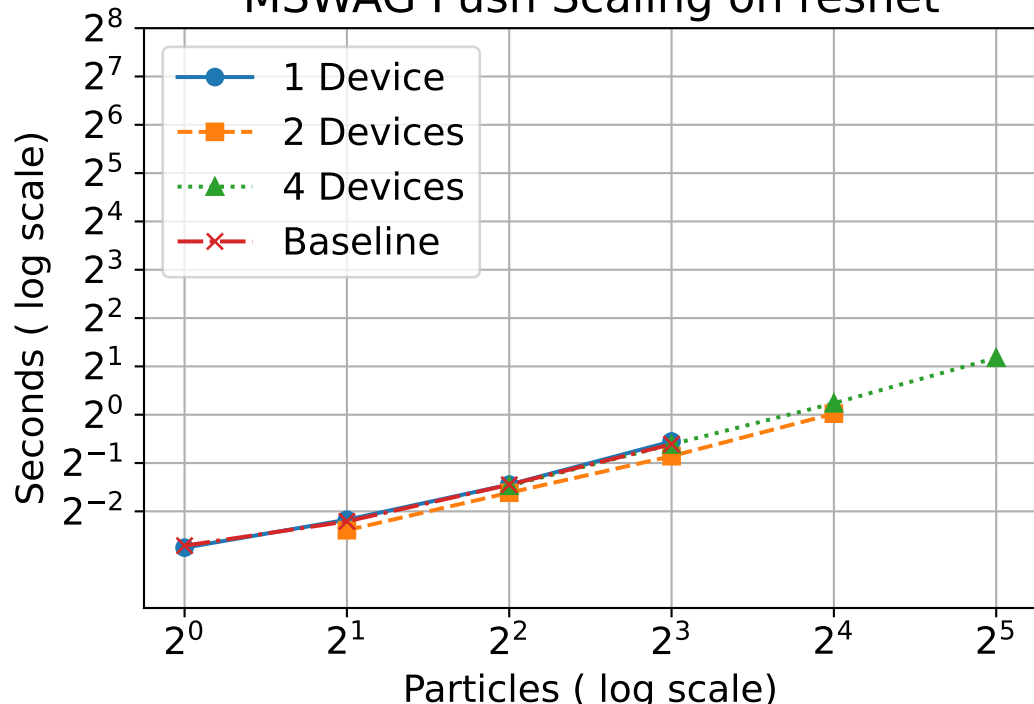

Supplement: supplementary_material [file attachment]

# Stein VGD Push Scaling on cgcnn

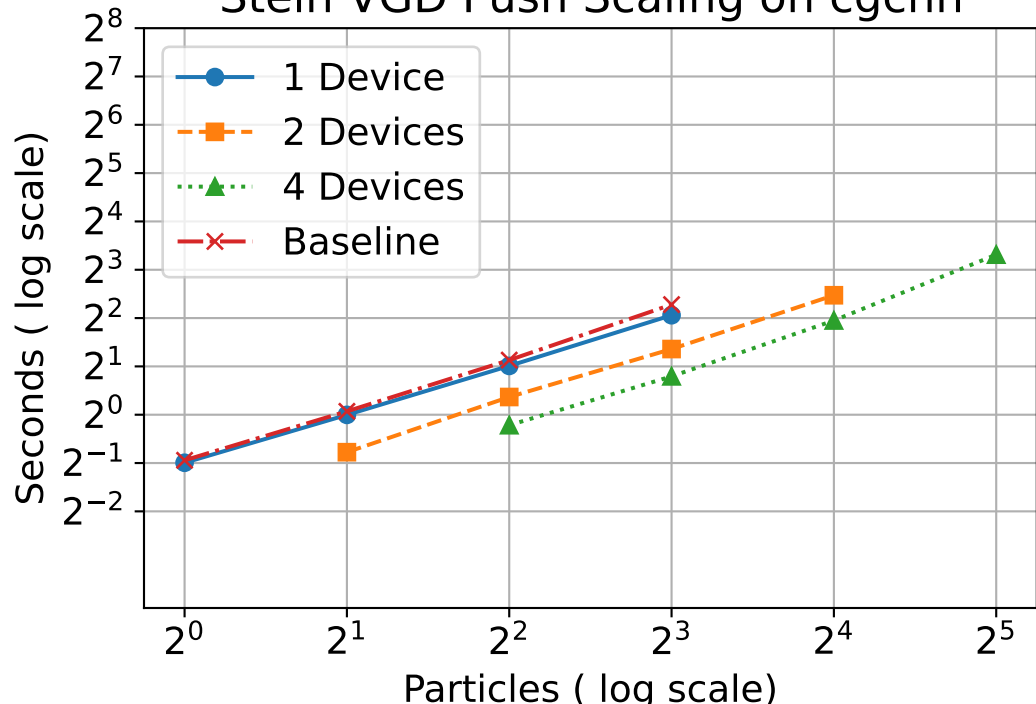

Supplement: supplementary_material [file attachment]

# Stein VGD Push Scaling on unet

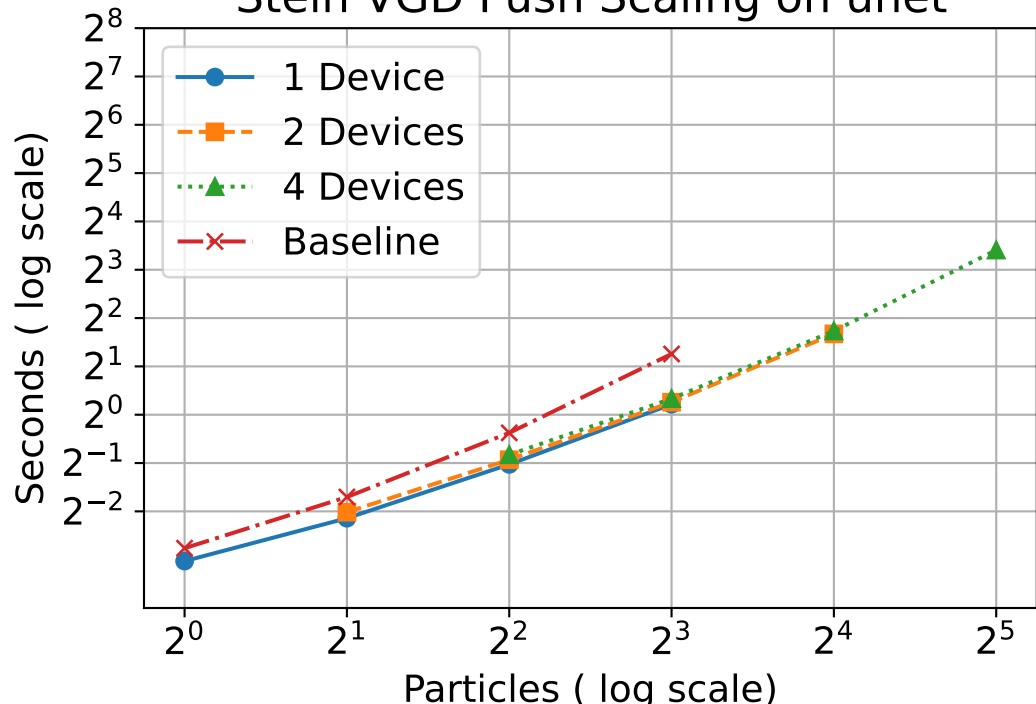

Supplement: supplementary_material [file attachment]

# MSWAG Push Scaling on unet

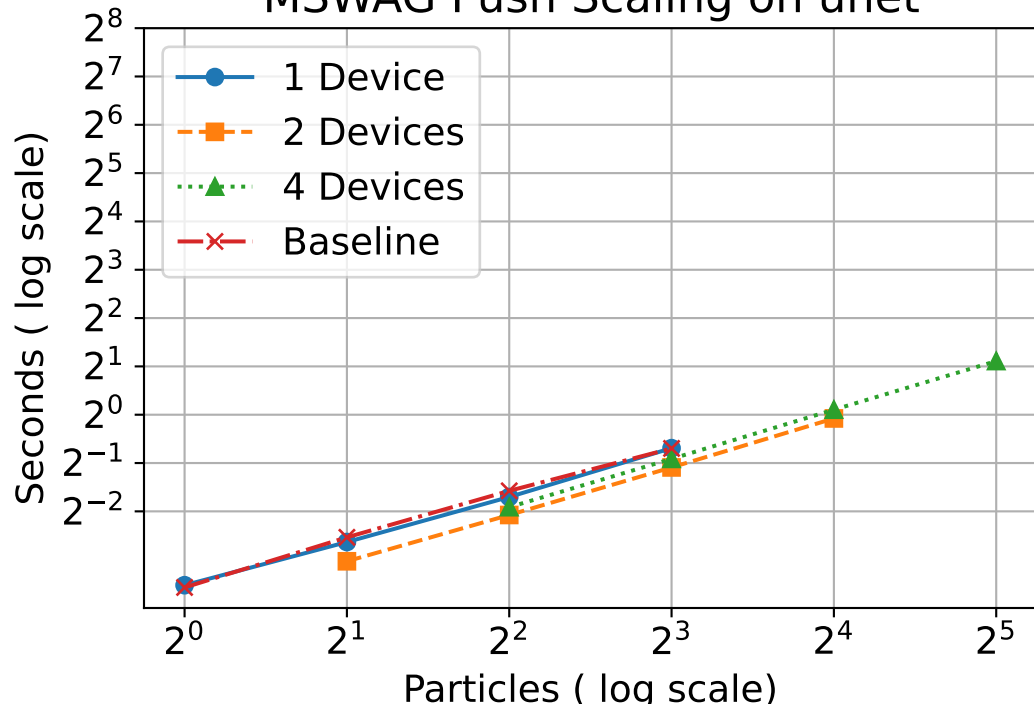

Supplement: supplementary_material [file attachment]

# Ensemble Push Scaling on resnet

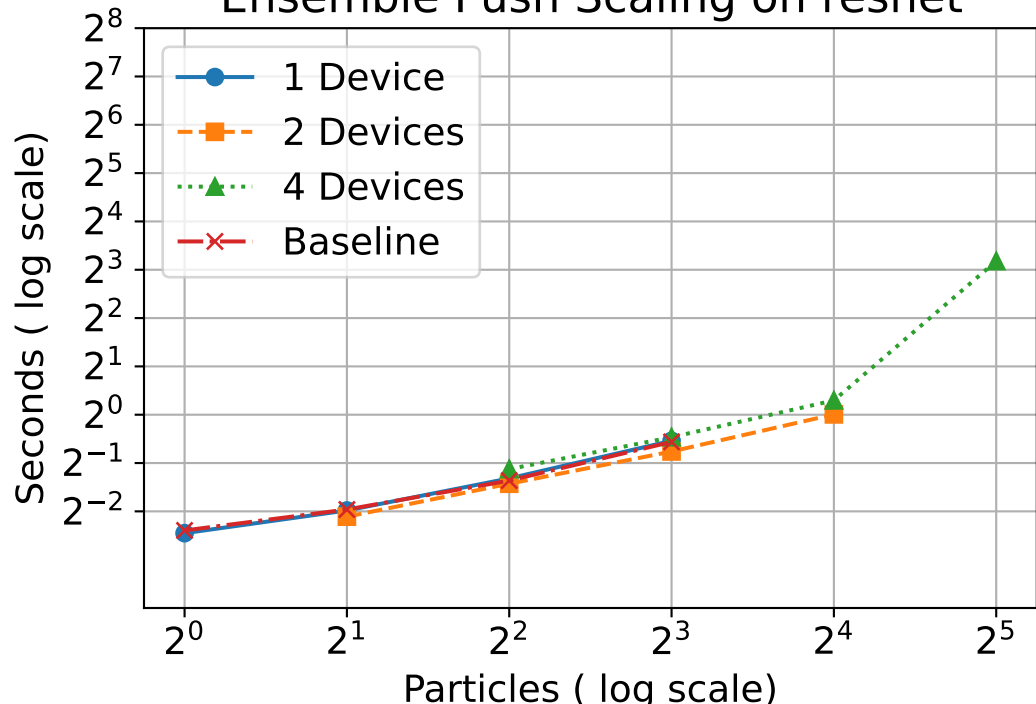

Supplement: supplementary_material [file attachment]

# MSWAG Push Scaling on transformer

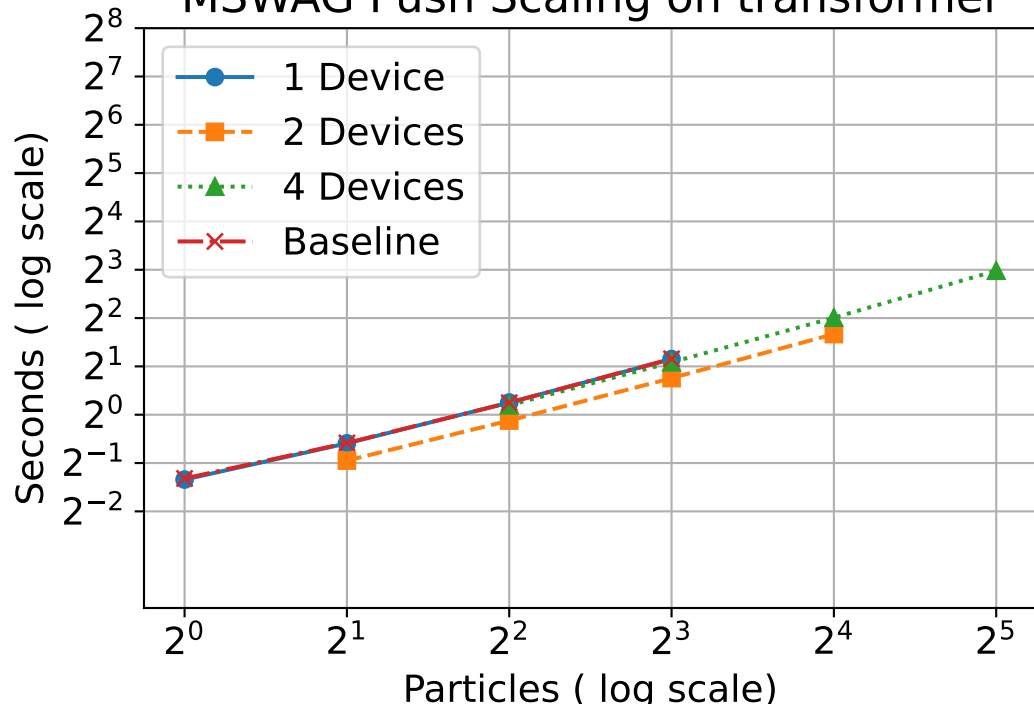

Supplement: supplementary_material [file attachment]
